# Supplementary material for: Pyoverdin mediated sunlight induced green synthesis of silver nanoparticles
Source: Royal Society of Chemistry journal article supplement (doi:10.1039/c5ra20856d), 2016-01-01
Supplement: c5ra20856d1.pdf [file c5ra20856d1.pdf]

## **Pyoverdin mediated sunlight induced green synthesis of silver nanoparticles**

### **Authors:**

Prashant R. Dane, Shraddha P. Pawar, Raksha A. Kankariya and Bhushan L. Chaudhari\*

### **Affiliations:**

Department of Microbiology, School of Life Sciences, North Maharashtra University, P. Box 80, Jalgaon - 425001 Maharashtra, India

### **\*Corresponding author:**

Department of Microbiology, School of Life Sciences,

North Maharashtra University, Jalgaon, Maharashtra, India

<blchaudhari@hotmail.com>, <blchaudhari@nmu.ac.in>

**Supplementary Information:**

**Fig. S1.** The fluorescence of *P. aeruginosa* PSR 213 grown on solid King's B medium observed before and after illuminated with UV transilluminator at 254 nm.

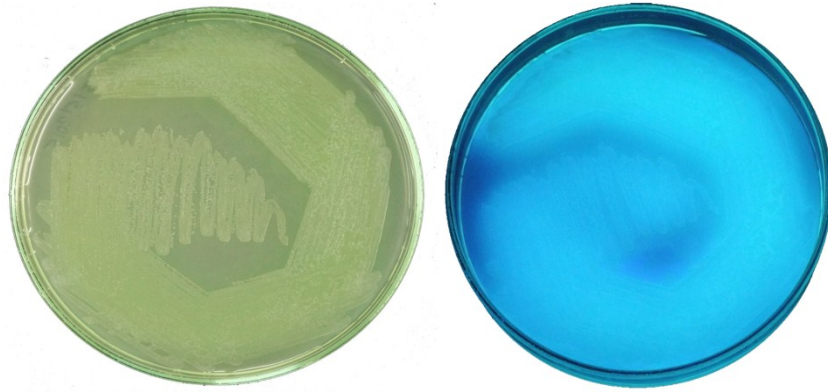

**S2.** UV-Visible spectrum of PVD produced by *Pseudomonas aeruginosa* PSR 213

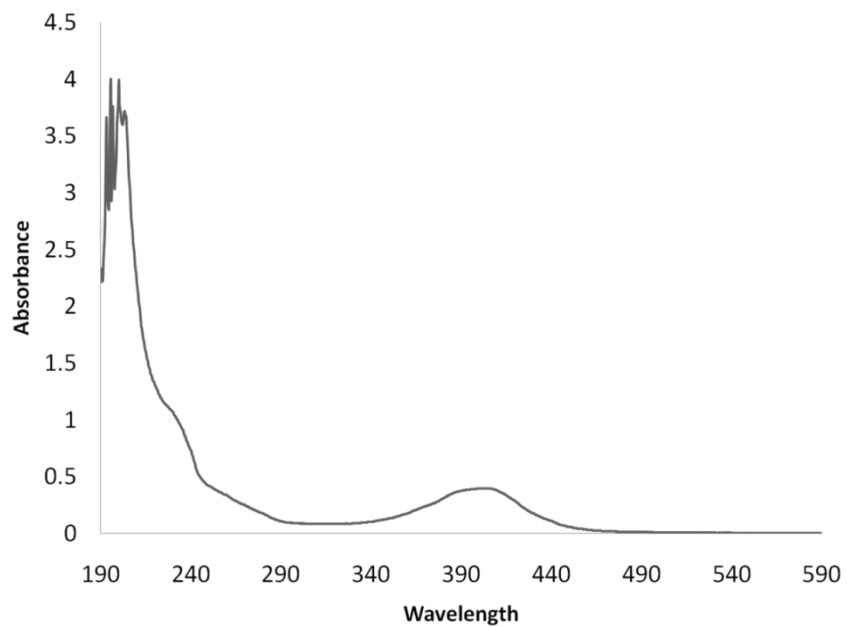

**S3. Morphological and biochemical characteristics of *Pseudomonas* sp.**

| <b>Morphological characteristics</b> |                                       |
|--------------------------------------|---------------------------------------|
| Colony on King'sB medium             | Opaque, regular, smooth               |
| Gram character                       | Gram negative short rods              |
| Microscopy                           | Motile                                |
| Spore                                | Non spore forming                     |
| Pigment on King'B                    | Bright fluorescent diffusible pigment |
| Growth on Cetrimide agar             | +                                     |
| <b>Biochemical characteristics</b>   |                                       |
| Amylase                              | +                                     |
| Catalase                             | +                                     |
| IMViC                                | + - - +                               |
| Oxidase                              | +                                     |
| H <sub>2</sub> S production          | -                                     |
| Glucose fermentation                 | -                                     |
| Haemolysis                           | Non haemolytic                        |

**I:Indole production; M: Methyl red; V: Voges-Proskauer; C: Citrate utilization**

The isolate SBC-I was (i) catalase and oxidase positive, (ii) able to produce indole and utilize citrate but unable to ferment glucose and failed to produce acetoin, H<sub>2</sub>S and on the basis of these results, the isolate SBC-I was tentatively identified as *Pseudomonas* sp.

S4. The 16s rRNA gene sequence of *Pseudomonas aeruginosa* PSR 213 submitted to GenBank (Accession No. KJ857033)

TGCAGTCGAGCGGATGAAGGGAGCTTGCTCCTGGATTGAGCGGCGGACGGGTGAGTAATGCCT  
AGGAATCTGCCTGGTAGTGGGGGATAACGTCCGGAAACGGGCGCTAATACCGCAGACGTCTCG  
AGGGAGAAAGTGGGGGATCTTCGGACCTCACGCTATCAGATGAGCCTAGGTCCGATTAGCTAGT  
TGGTGGGGTAAAGGCCTACCAAGGCGACGATCCGTAACCTGGTCTGAGAGGATGATCAGTCACA  
CTGGAACCTGAGACACGGTCCAGACTCCTACGGGAGGCAGCAGTGGGGAAATATTGGACAATGGG  
CGAAAGCCTGATCCAGCCATGCCGCGTGTGTGAAGAAGGTCTTCGGATTGTAAAGCACTTTAAG  
TTGGGAGGAAGGGCAGTAAGTTAATACCTTGCTGTTTTGACGTTACCAACAGAATAAGCACCGG  
CTAACTTCGTGCCAGCAGCCGCGTAATACGAAGGGTGAAGCGTTAATCGGAATTACTGGGCG  
TAAAGCGCGCGTAGGTGGTTCAGCAAGTTGGATGTGAAATCCCAGGGCTCAACCTGGGAACTG  
CATCCAAACTACTGAGCTAGAGTACGGTAGAGGGGTGGTGGAAATTCCTGTGTAGCGGTGAAA  
TGCCTAGATATAGGAAGGAACACCAGTGGCGAAAGGCGACCACCTGGACTGATACTGACACTG  
AGGTGCGAAAGCGTGGGGAGCAAACAGGATTAGATACCCTGGTAGTCCACGCCGTAAACGATG  
TCGACTAGCCGTTGGGATCCTTGAGATCTTAGTGGCGCAGCTAACCGGATAAGTCGACCGCCTG  
GGGAGTACGGCCGCAAGGTTAAAACCTCAAATGAATTGACGGGGGCCCCGACAAGCGGTGGAG  
CATGTGGTTTAATTGAAGCAACGCGAAGAACCTTACCTGGCCTTGACATGCTGAGAATTTC  
GAGATGGATTGGTGCCTTCGGGAACTCAGACACAGGTGCTGCATGGCTGTCGTCAGCTCGTGT  
GTGAGATGTTGGGTTAAGTCCCGTAACGAGCGCAACCCTTGTCTTAGTTACCAGCACCTCGGGT  
GGCACTCTAAGGAGACTGCCGGTGACAAACCGGAGGAAGGTGGGGATGACGTCAAGTCATC  
ATGGCCCTTACGGCCAGGGCTACACACGTGCTACAATGGTCCGTACAAAGGGTTGCCAAGCCGC  
GAGGTGGAGCTAATCCATAAAACCGATCGTAGTCCGGATCGCAGTCTGCAACTCGACTGCGTG  
AAGTCGGAATCGTAGTAATCGTGAATCAGAATGTCACGGTGAATACGTTCCCGGGCCTTGTA  
CACCGCCCGTCACACCATGGGAGTGGGTTGCTCCAGAAGTAGCTAGTCTAACCGCAAGGGGGA  
CGGTACCTCT

S5. RP-HPLC of purified pyoverdinin produced by *Pseudomonas aeruginosa* PSR 213.

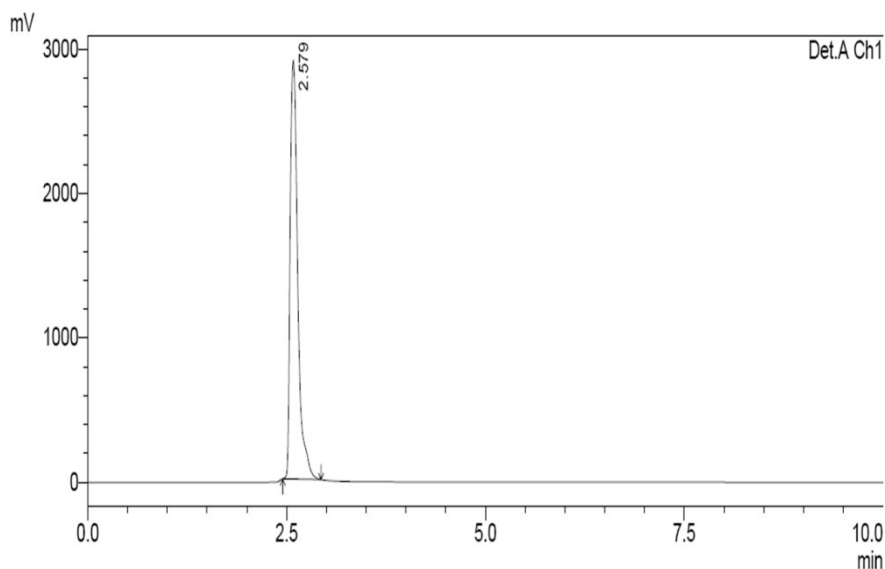

S6. UV-Vis spectra of PVD, PVD (exposed to sunlight), PVD-AgNO<sub>3</sub>, PVD-AgNps (synthesized AgNps after exposed to sunlight), PVD-AgNO<sub>3</sub> purged with N<sub>2</sub> (exposed to sunlight) and PVD-AgNO<sub>3</sub> added with SOD (exposed to sunlight).

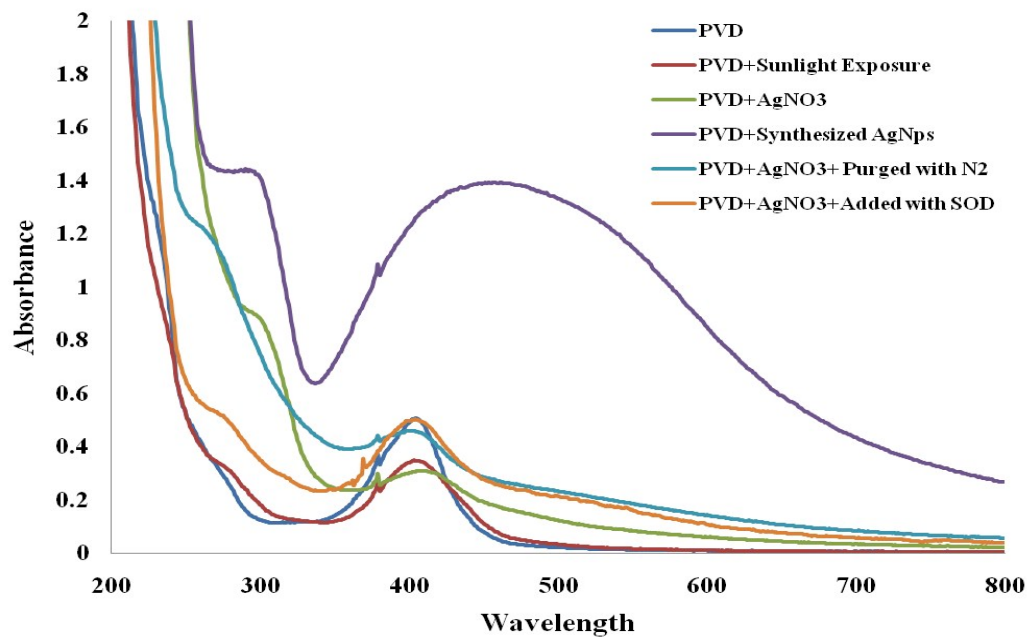

S7. Photograph of AgNps synthesized with function of time.

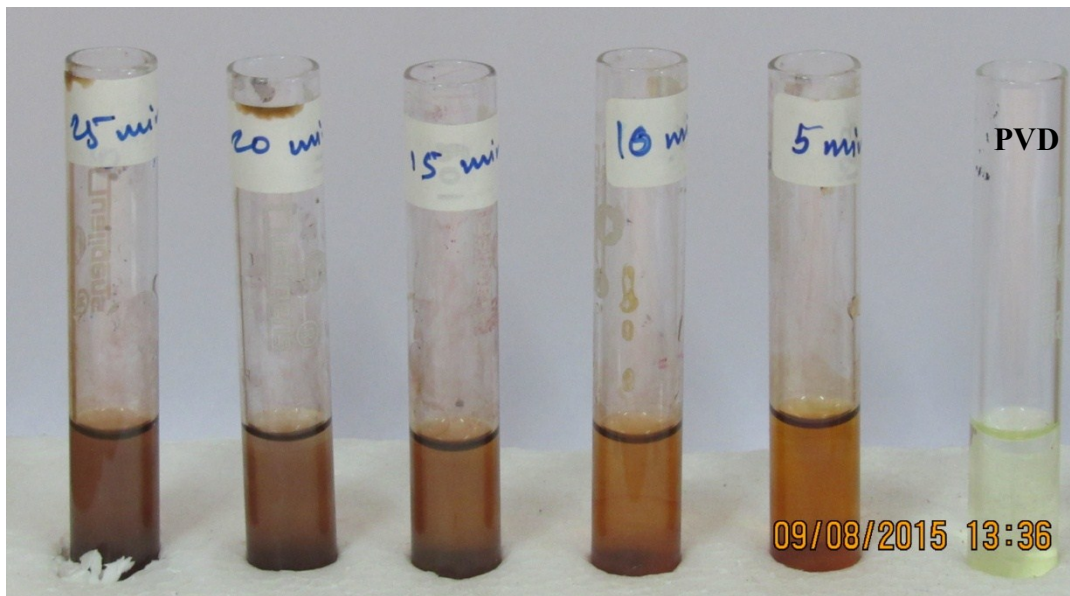

**S8.** Antibacterial activity of AgNps against human pathogens *Escherichia coli*, *Salmonella typhi*, *Bacillus spizizenii* and *Staphylococcus aureus*

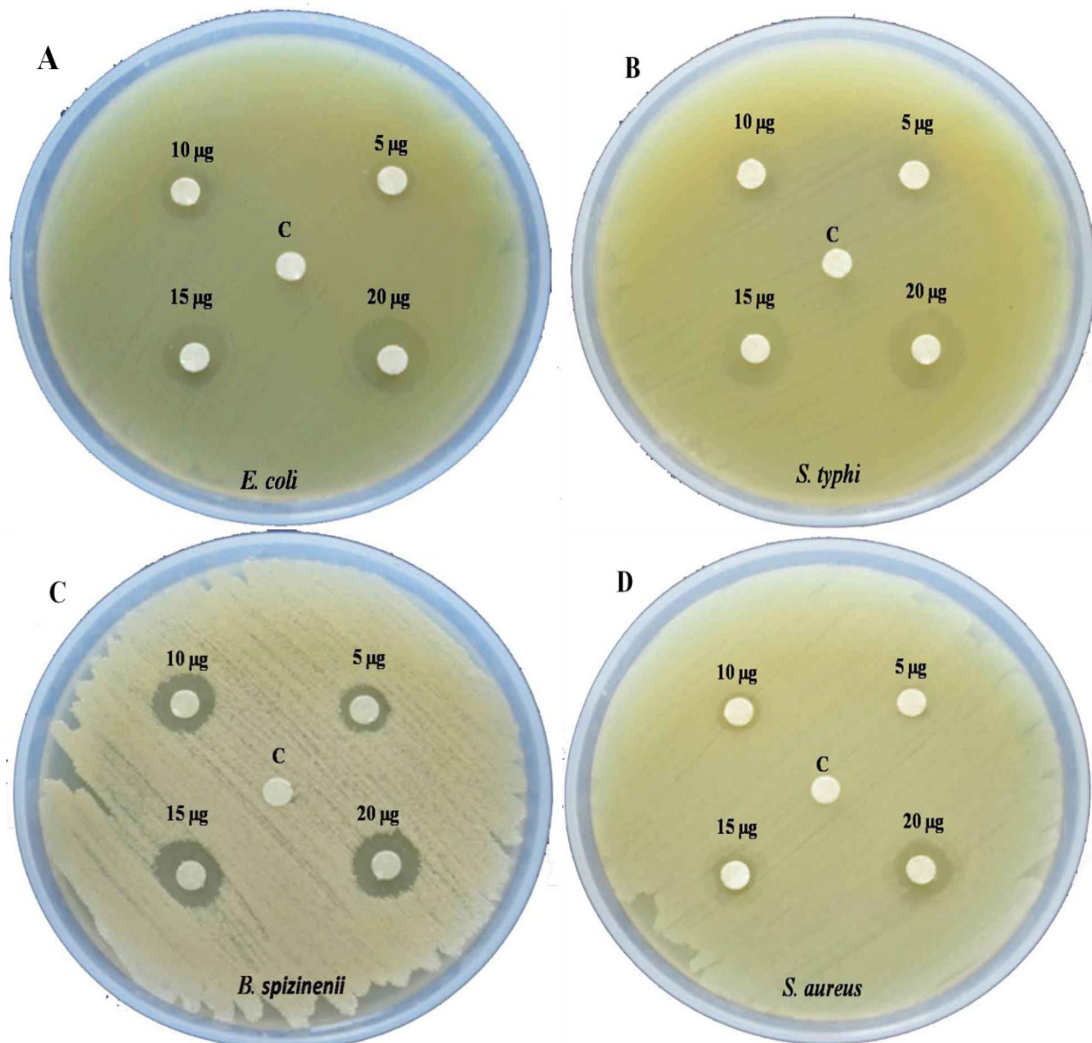

S9. The size evolutions of the resultant AgNps upon the sun-light illumination durations from 5 min to 30 min.

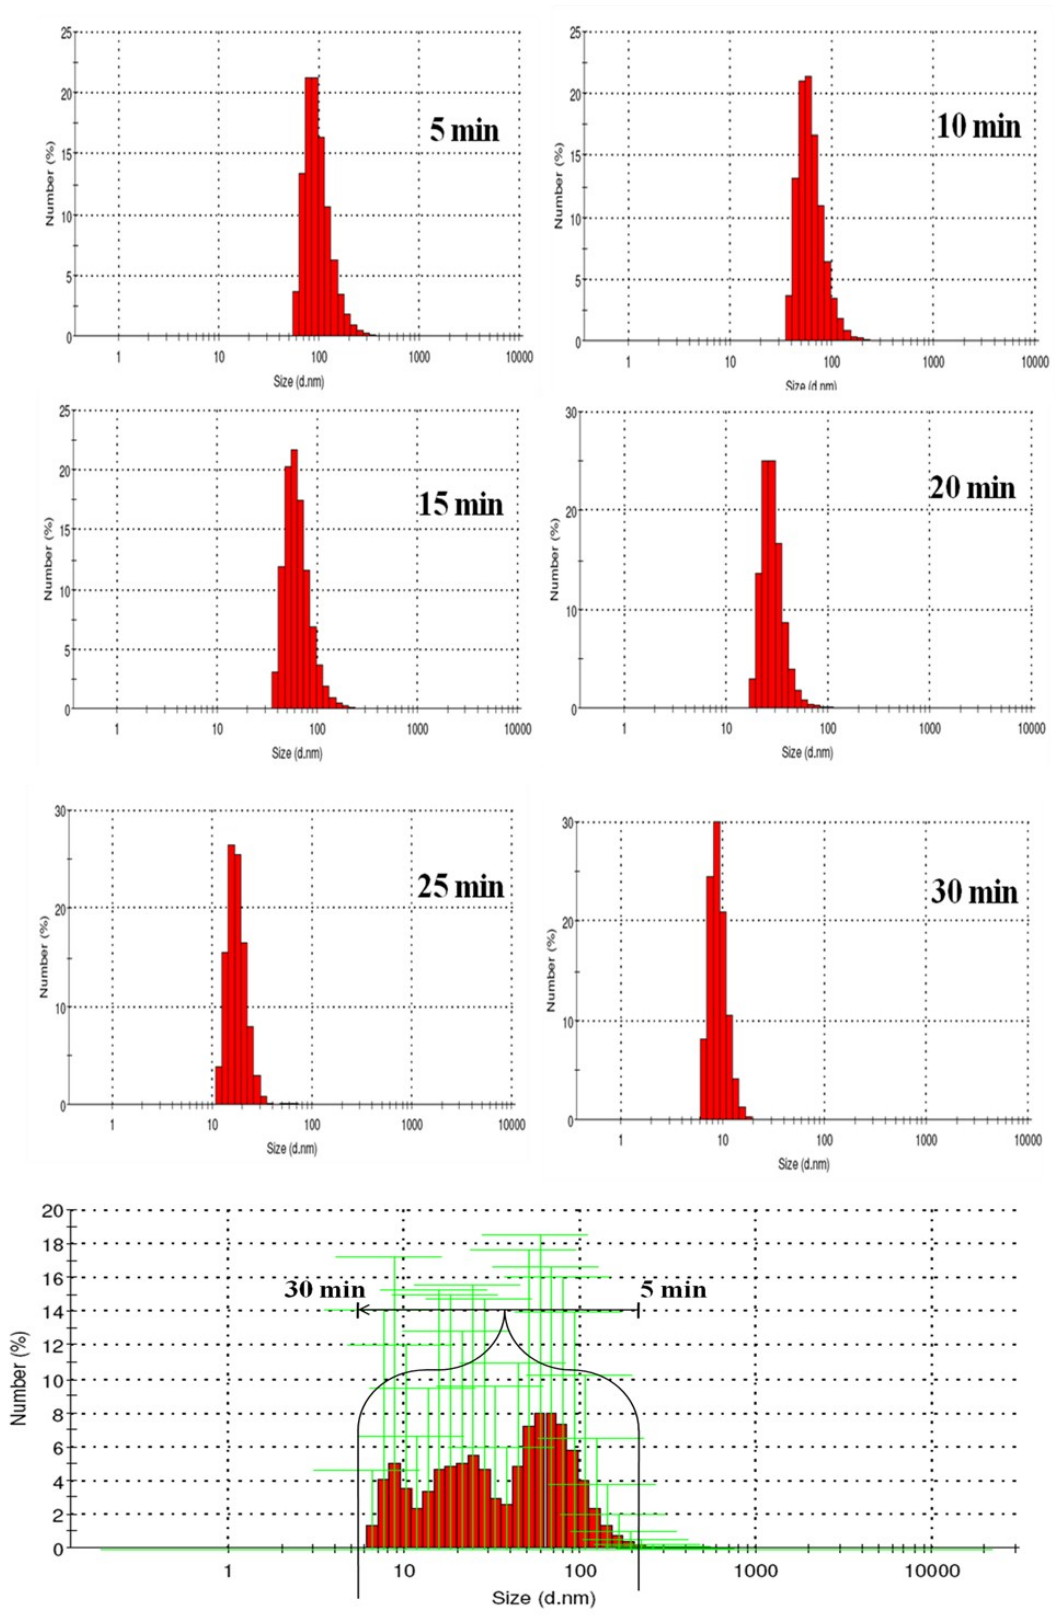



**Table S1.** Screening of 3 different medium for siderophoregenesis of *Pseudomonas* sp.

| Isolates | Siderophore Units (%) |     |     |
|----------|-----------------------|-----|-----|
|          | SCM                   | KMB | PPM |
| SBC-A    | 75                    | 62  | 31  |
| SBC-I    | 80                    | 66  | 29  |
| SBC-J    | 72                    | 57  | 28  |
| SBC-K    | 63                    | 46  | 32  |
| SBC-L    | 56                    | 47  | 30  |
| SBC-M    | 50                    | 43  | 33  |

**SCM:** Succinic Acid Medium; **KMB:** King's B Medium; **PPM:** Pigment Production Medium

**Table S2.** Antibacterial activity of synthesized AgNps.

| Pathogen                                 | Concentration of AgNps ( $\mu\text{g/ml}$ ) | Mean zone of Inhibition (mm) |
|------------------------------------------|---------------------------------------------|------------------------------|
| <i>Escherichia coli</i> (ATCC 8739)      | 05                                          | 07                           |
|                                          | 10                                          | 10                           |
|                                          | 15                                          | 14                           |
|                                          | 20                                          | 15                           |
| <i>Salmonella typhi</i> (NCIM 2501)      | 05                                          | 10                           |
|                                          | 10                                          | 10                           |
|                                          | 15                                          | 15                           |
|                                          | 20                                          | 17                           |
| <i>Bacillus spizizenii</i> (ATCC 6633)   | 05                                          | 10                           |
|                                          | 10                                          | 14                           |
|                                          | 15                                          | 15                           |
|                                          | 20                                          | 15                           |
| <i>Staphylococcus aureus</i> (ATCC 6538) | 05                                          | 00                           |
|                                          | 10                                          | 08                           |
|                                          | 15                                          | 08                           |
|                                          | 20                                          | 11                           |
